# Supplementary material for: Exploring the Role of Hypoxia-Inducible Carbonic Anhydrase IX (CAIX) in Circulating Tumor Cells (CTCs) of Breast Cancer
Source: MDPI journal article supplement (doi:10.3390/biomedicines11030934), 2023-03-17
Supplement: s1 [file s1]

**Table S1:** indicating the subtyping per ATCC, disease classification per ATCC, ability to form spheres under suspension culture, and anoikis resistance or sensitivity through seven days of suspension culture.

| Cell Line | Subtyping*                                            | Tissue                      | Disease Classification                                                              | Sphere Forming (Y/N) | Anoikis Resistant/Sensitive |
|-----------|-------------------------------------------------------|-----------------------------|-------------------------------------------------------------------------------------|----------------------|-----------------------------|
| HCC1937   | TNBC (Basal-Like)                                     | Breast; Duct; Mammary gland | Primary ductal carcinoma; Stage IIB, grade 3;                                       | N                    | Sensitive                   |
| BT20      | TNBC (Basal-Like)                                     | Breast; Mammary gland       | Breast tumor carcinoma                                                              | Y                    | Resistant                   |
| HCC38     | TNBC (Claudin-Low)                                    | Breast; Duct; Mammary gland | Stage IIB, Grade 3, with 3/28 lymph node metastasis.                                | N                    | Sensitive                   |
| MB-231    | TNBC (Claudin-Low)                                    | Breast; Mammary gland       | Adenocarcinoma                                                                      | N                    | Resistant                   |
| HS578T    | TNBC (Claudin-Low)                                    | Breast; Mammary gland       | Carcinoma                                                                           | N                    | Sensitive                   |
| BT549     | TNBC (Claudin-Low)                                    | Breast; Mammary gland       | Papillary, invasive ductal carcinoma with metastasis to 3 of 7 regional lymph nodes | Y                    | Resistant                   |
| T47D      | ER <sup>+</sup> / PR <sup>+</sup>                     | Breast; Mammary gland       | Infiltrating ductal carcinoma with pleural effusion                                 | Y                    | Resistant                   |
| MCF7      | ER <sup>+</sup>                                       | Breast; Mammary gland       | Breast adenocarcinoma with pleural effusion                                         | Y                    | Resistant                   |
| ZR75-1    | ER <sup>+</sup>                                       | Breast; Duct; Mammary gland | Ductal carcinoma                                                                    | N                    | Resistant                   |
| BT474     | ER <sup>+</sup> / PR <sup>+</sup> / HER2 <sup>+</sup> | Breast; Duct; Mammary gland | Solid, invasive ductal carcinoma                                                    | Y                    | Resistant                   |
| AU565     | HER2 <sup>+</sup>                                     | Breast; Mammary gland       | Breast adenocarcinoma with pleural effusion                                         | N                    | Resistant                   |
| SKBR3     | HER2 <sup>+</sup>                                     | Breast; Mammary gland       | Breast adenocarcinoma with pleural effusion                                         | N                    | Resistant                   |

\*Triple negative breast cancer, TNBC; Estrogen receptor positive, ER<sup>+</sup>; Progesterone receptor positive, PR<sup>+</sup>; Human epidermal growth factor receptor 2 positive, HER2<sup>+</sup>; ATCC, American Type Culture Collection (<http://www.atcc.org/>).

**Table S2.** Signaling pathway analysis performed using DAVID on the genes that were significantly upregulated or downregulated in both MB-231 and MCF7 cell lines. The significant GO\_BP Terms with the associated p-values and genes are shown (False Discovery Rate (FDR) <0.05, p<0.05).

|               | Gene Ontology Term: Biological Process |                                                     | P-Value | Gene Count | Genes                                  |
|---------------|----------------------------------------|-----------------------------------------------------|---------|------------|----------------------------------------|
| Upregulated   | GO:0010628                             | Positive regulation of gene expression              | 0.0004  | 6          | GJA1, NFIL3, FN1, ACTG2, HSPA1B, VEGFA |
|               | GO:0001666                             | Response to hypoxia                                 | 0.0079  | 4          | CA9, ADM, ANGPTL4, VEGFA               |
|               | GO:0030198                             | Extracellular matrix organization                   | 0.0113  | 4          | CSGALNACT1, ELF3, LOX, FN1             |
|               | GO:0061621                             | Canonical glycolysis                                | 0.0017  | 3          | PFKFB4, ENO2, HK2                      |
|               | GO:0002576                             | Platelet degranulation                              | 0.0250  | 3          | FN1, TUBA4A, VEGFA                     |
|               | GO:0045766                             | Positive regulation of angiogenesis                 | 0.0306  | 3          | ADM, ANGPTL4, VEGFA                    |
| Downregulated | GO:0045087                             | Innate immune response                              | 0.0202  | 4          | APP, MAVS, TRIM25, C4BPB               |
|               | GO:0032480                             | Negative regulation of type I interferon production | 0.0403  | 2          | MAVS, TRIM25                           |

**Table S3.** The top KEGG\_PATHWAY from the DAVID analysis for the upregulated and downregulated gene panels. (False Discovery Rate (FDR) <0.05, p<0.05)

|               | KEGG_PATHWAY |                                       | P-Value | Gene Count | Genes                    |
|---------------|--------------|---------------------------------------|---------|------------|--------------------------|
| Upregulated   | hsa04066     | HIF-1 signaling pathway               | 0.0038  | 4          | SLC2A1, ENO2, HK2, VEGFA |
| Downregulated | hsa04622     | RIG-I-like receptor signaling pathway | 0.0074  | 3          | MAVS, RNF125, TRIM25     |

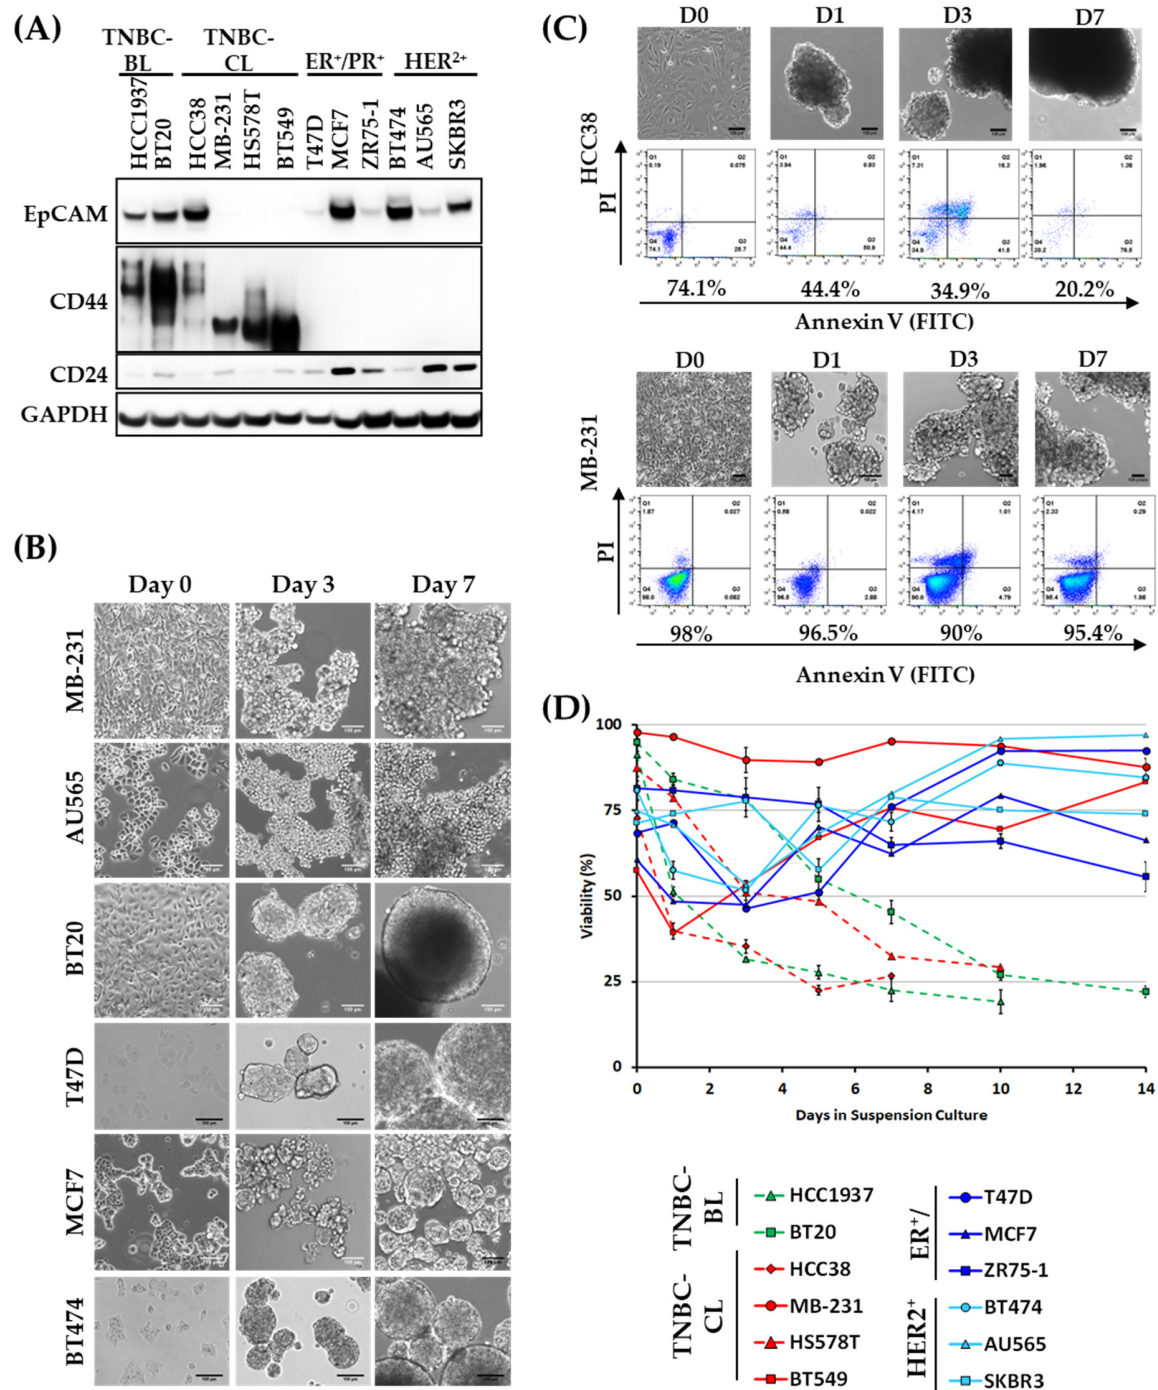

**Figure S1.** Immunoblot analysis of panel of monolayer cultured BCC lines for CSC markers and cell line screening for anoikis resistance over 14 days of suspension culture. **(A)** A panel of monolayer cultured breast cancer cell lines were screened for the stem cell markers of CD44 and CD24 as well as the epithelial marker of EpCAM using immunoblotting. **(B)** Brightfield microscopy was performed at days 0, 3, and 7 of suspension culture to determine whether cell lines formed spheroids under suspension culture. Scale bar = 100  $\mu$ m. **(C)** The panel was screened for anoikis resistance following monolayer culture (D0) and at the indicated timepoints over 14 days of suspension culture using bright field imaging and a flow

cytometry apoptosis assay. (D) Viability (no detection of anti-annexin V-FITC or propidium iodide) was assessed over 14 days of culture. Cell lines were determined anoikis resistant if viability was maintained over 50% during suspension subculture. Triple negative breast cancer- basal-like, TNBC-BL; Triple negative breast cancer- claudin low, TNBC-CL

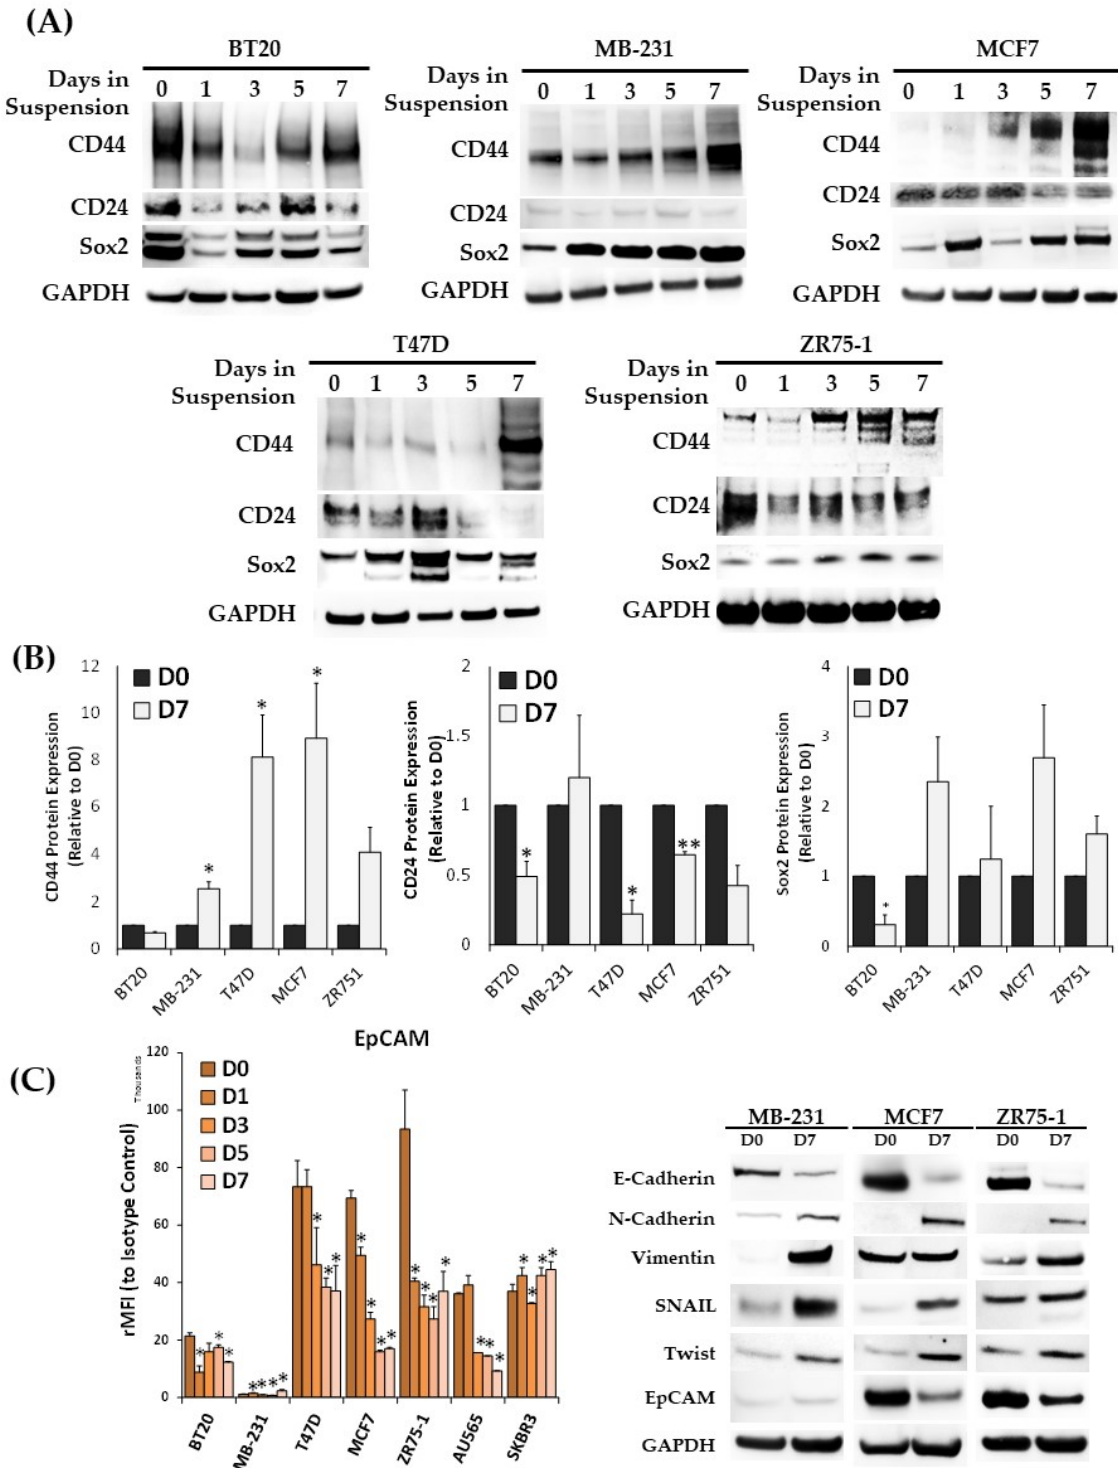

**Figure S2.** Immunoblot and flow cytometry analysis of BCCs cultured in suspension for CSC and EMT markers. (A) The panel of BCC lines was analyzed for CD44, CD24, and Sox2 expression at the indicated time points following suspension condition or monolayer culture (D0). Immunoblot images are representative of 3 biological replicates. (B) Relative protein expression is shown to monolayer (day 0) (relative densitometric analysis). (N≥3; \*p<0.05 to D0). (C) EMT markers were analyzed in the panel of BCCs cultured in suspension over the 7 days. EpCAM surface expression (relative median fluorescence to isotype control) was shown to decrease over the 7 days of culture relative to monolayer. (N=3; \*p<0.05 to D0). EMT protein expression was analyzed using immunoblotting of MB-231, MCF7, and ZR75-1 cells cultured for 0 or 7 days in suspension. All statistics were performed with Graph Pad Prism, with an unpaired t-test with Welch's Correction.

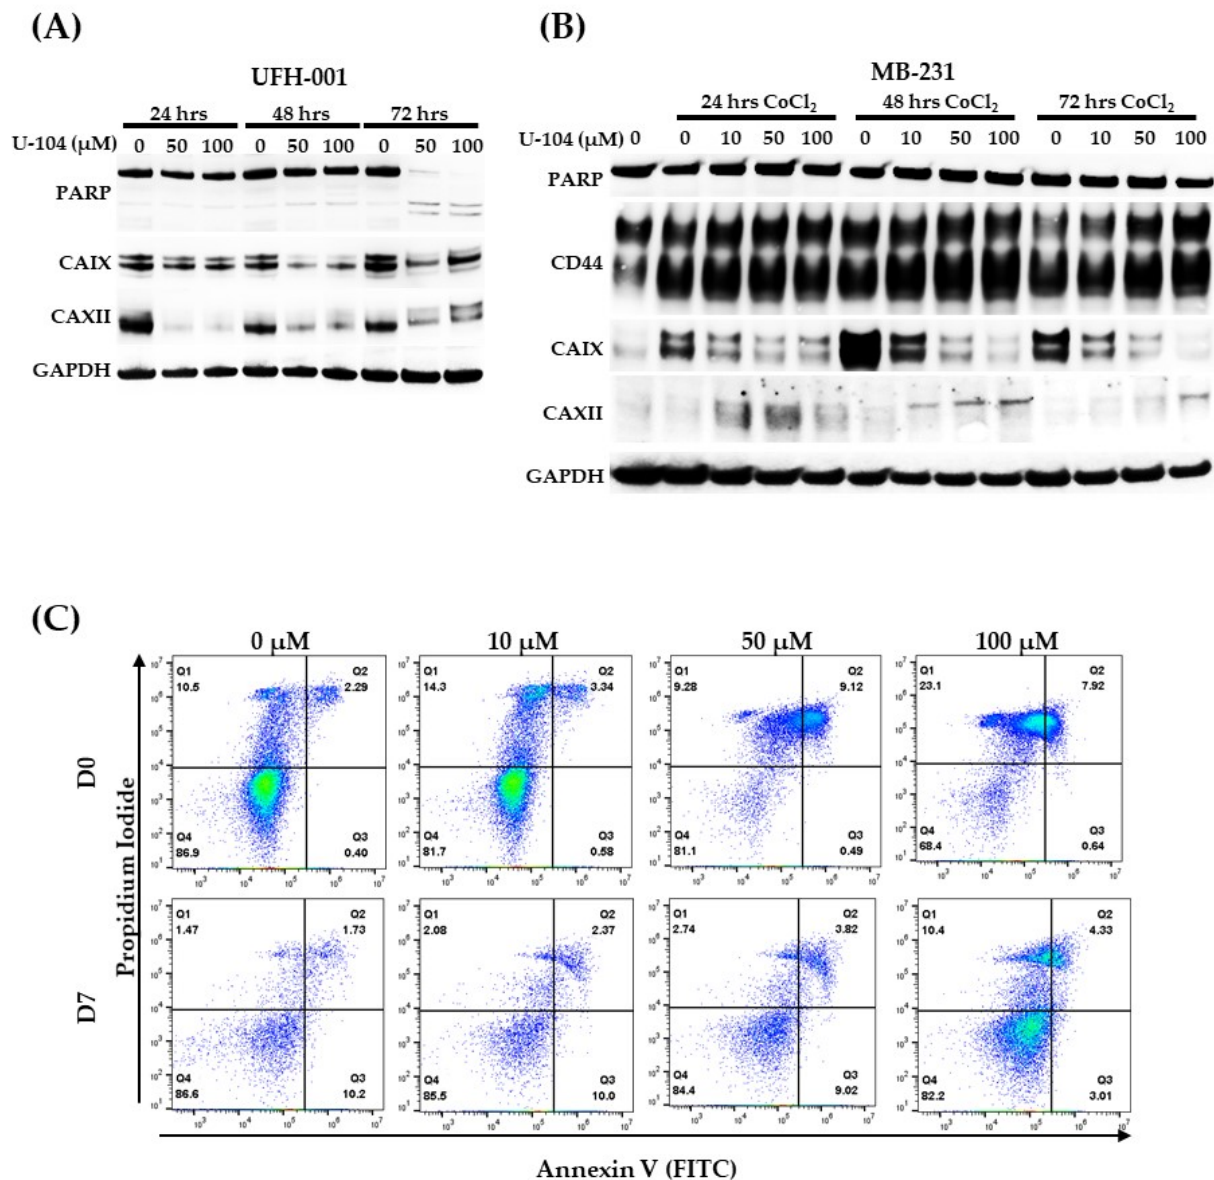

**Figure S3.** Determination of the impact of a low, medium, and high concentration of U-104 on viability and hypoxia-related protein expression on UFH-001 and MB-231 cells. (A) UFH-001 cell line was

analyzed following U-104 treatment for 24, 48, or 72 hours in monolayer culture. By 72 hours, treatment with U-104 resulted in cell death, as visualized by cells lifting off of monolayer and PARP cleavage and degradation. 50  $\mu$ M of treatment was sufficient to reduce CAIX and CAXII expression. **(B)** MB-231 cells were treated with 200  $\mu$ M of CoCl<sub>2</sub> for a chemical simulation of hypoxia for 24, 48 or 72 hours containing 0, 10, 50, or 100  $\mu$ M of U-104 at which point cells were harvested for immunoblotting. CD44 total expression was not impacted by the U-104 treatment when stimulated by CoCl<sub>2</sub>. CoCl<sub>2</sub> treatment stimulated CAIX expression, which was reduced when treated with U-104 in a dose-dependent manner. Viability as reported through PARP cleavage was not impacted. **(C)** MB-231 cells were cultured in monolayer (D0) or suspension culture for 7 days (D7) and then treated with U-104 for 24 hours. Viability was assessed using an apoptosis flow cytometry assay.
